# Supplementary material for: Sex-dependent and -independent transcriptional changes during haploid phase gametogenesis in the sugar kelp Saccharina latissima
Source: PLoS One. 2019 Sep 12;14(9):e0219723. doi: 10.1371/journal.pone.0219723 (PMC6742357; doi:10.1371/journal.pone.0219723)
Supplement: S1 Table — A) Read data used in the study. B) Assembly statistics for initial assembly (Velvet-Oases) and final reference after merging with transfuse. C) Basic annotation statistics for reference S. latissima transcriptome. (XLSX) [file pone.0219723.s002.xlsx]

## Sheet: S1a  Data
S1 Table. Read data, assembly and annotation statistics
A) Read data used in the study.
Quality-filtered paired-end read data (100 x 2 bp, HiSeq 2000) for samples used in the study.
SLO = S. latissima from Oslo Fjord; SLS = S. latissima from Svalbard. F = female, M = male.
Sample	Time (d)	Sex	reads(1+2; M)
SLO	0	F	33.886
SLS	0	F	28.1921
SLO	1	F	27.405
SLS	1	F	27.8288
SLO	6	F	34.8243
SLS	6	F	36.0152
SLO	8	F	35.1548
SLS	8	F	35.9085
SLO	0	M	29.6257
SLS	0	M	38.2478
SLO	1	M	34.5499
SLS	1	M	41.1462
SLO	6	M	30.2278
SLS	6	M	28.2247
SLO	8	M	29.713
SLS	8	M	34.4751
Mean			32.8391
SE			1.03724

## Sheet: S1b Assembly
S1 Table. Read data, assembly and annotation statistics
B) Assembly statistics for initial assembly (Velvet-Oases) and final reference after merging with transfuse.
Merged Assembly (Velvet-Oases, K=21-61, S=10; merged with transfuse)
N50 bp	1509
max bp	48139
mean bp	937
>500 bp	180560
>1000 bp	95056
>5 Kbp	2720
Contigs	323917
Reference transcriptome (FragGeneScan ORFs, top hit "Phaeophyceae")
N50 bp	1281
max bp	13113
mean bp	1018
>500 bp	26066
>1000 bp	13586
>5 Kbp	75
Contigs	34002

## Sheet: S1c Annotation
S1 Table. Read data, assembly and annotation statistics
C) Basic annotation statistics for reference S. latissima transcriptome.
Annotation	contigs (number)	contigs (%)	# unique terms
TBH: Phaeophyceae	34008	100	-
TBH: Ectocarpus Ec32	28204	82.9334	-
InterPro	22109	65.0112	6123
Pfam	19102	56.1691	3604
KEGG ko	13028	38.3086	3475
Total (IP, PF, KO)	22807	67.0636	-
BUSCO v.2 (Eukaryota)	Complete (C)	Fragmented (F)	C + F	Missing
Percentage (n = 429)	74.9	17.5	92.4	7.6
